# Supplementary material
Source: PubMed Central journal article supplement (PMC4565766)
Supplement: NIHMS711386-supplement-4.pdf [file NIHMS711386-supplement-4.pdf]

Supplementary Table 3. Laboratory test results of Han Chinese patients for kidney, liver functions and lipid levels.

| Patient | Liver functions |     |     | Kidney functions |      |     |    |                |                 |                 | Lipid levels |                  |                  |
|---------|-----------------|-----|-----|------------------|------|-----|----|----------------|-----------------|-----------------|--------------|------------------|------------------|
|         | ALT             | AST | ALP | SCr              | Urea | Glu | UA | K <sup>+</sup> | Na <sup>+</sup> | Cl <sup>-</sup> | TC           | TG *             | ApoB #           |
| SRF71   | —               | —   | —   | —                | —    | —   | —  | —              | —               | —               | —            | —                | —                |
| SRF964  | —               | —   | —   | —                | —    | —   | —  | —              | —               | —               | —            | —                | —                |
| SRF1186 | —               | —   | —   | —                | —    | —   | —  | —              | —               | —               | —            | —                | —                |
| SRF117  | —               | —   | —   | —                | —    | —   | —  | —              | —               | —               | —            | —                | —                |
| SRF92   | —               | —   | —   | —                | —    | —   | —  | —              | —               | —               | —            | 2.67 (0.45-1.70) | 1.06 (0.60-1.00) |

ALT, alanine aminotransferase; AST, aspartate aminotransferase; ALP, alkaline phosphatase; SCr, serum creatinine; Glu, fasting plasma glucose; UA, uric acid; TC, total cholesterol; TG, triglycerides; ApoB, Apolipoprotein B; —, normal; \*, mmol/L; #, g/L; The numbers in parentheses indicate the normal range for the laboratory tests.
